# Supplementary material for: Potential earthquake-prone faults identified by dense seismic array monitoring in complex extensional settings
Source: Research Square preprint supplement (doi:10.21203/rs.3.rs-6727679/v1), 2025-07-24
Supplement: Supplementary file 1 [file 13bc3755d61332eeef7f271d.docx]

*Supplementary Information for:*

**Identifying potential earthquake-prone structures from short-term array monitoring in complex normal fault systems**

**Francesco Scotto di Uccio, Titouan Muzellec, Antonio Scala, Grazia De Landro, Giovanni Camanni, Francesco Carotenuto, Luca Elia, Matteo Picozzi, Aldo Zollo, Claudio Strumia, Gregory C. Beroza, Gaetano Festa**

**Figure S1**


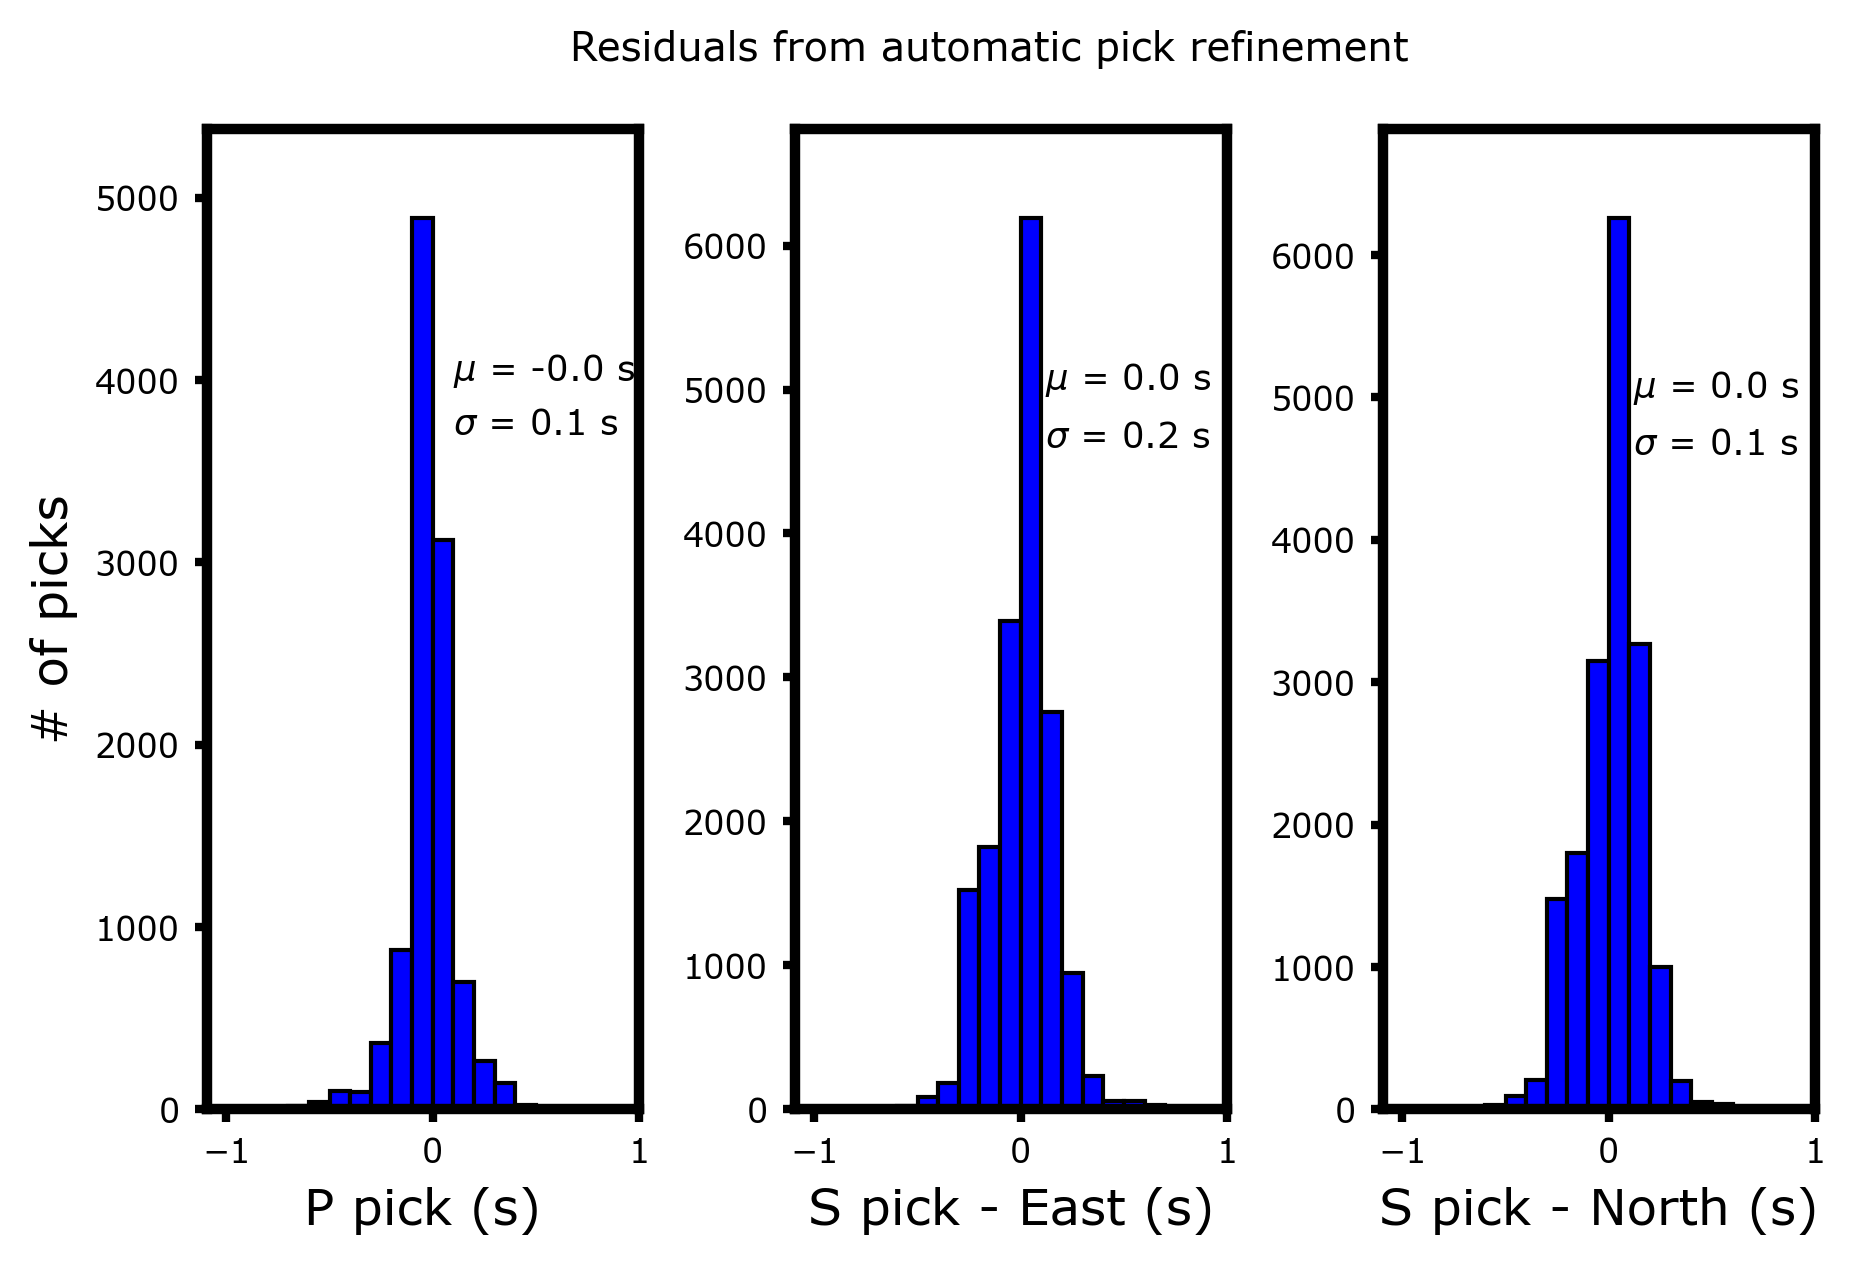


***Figure S1:*** *Results from the refinement of the automatic phase arrival times using waveform similarity and hierarchical clustering for the P and S picks. The average correction term is compatible with 0 for both phases, however small corrections can be introduced for constraining small-scale features of seismicity.*

**Figure S2**

**
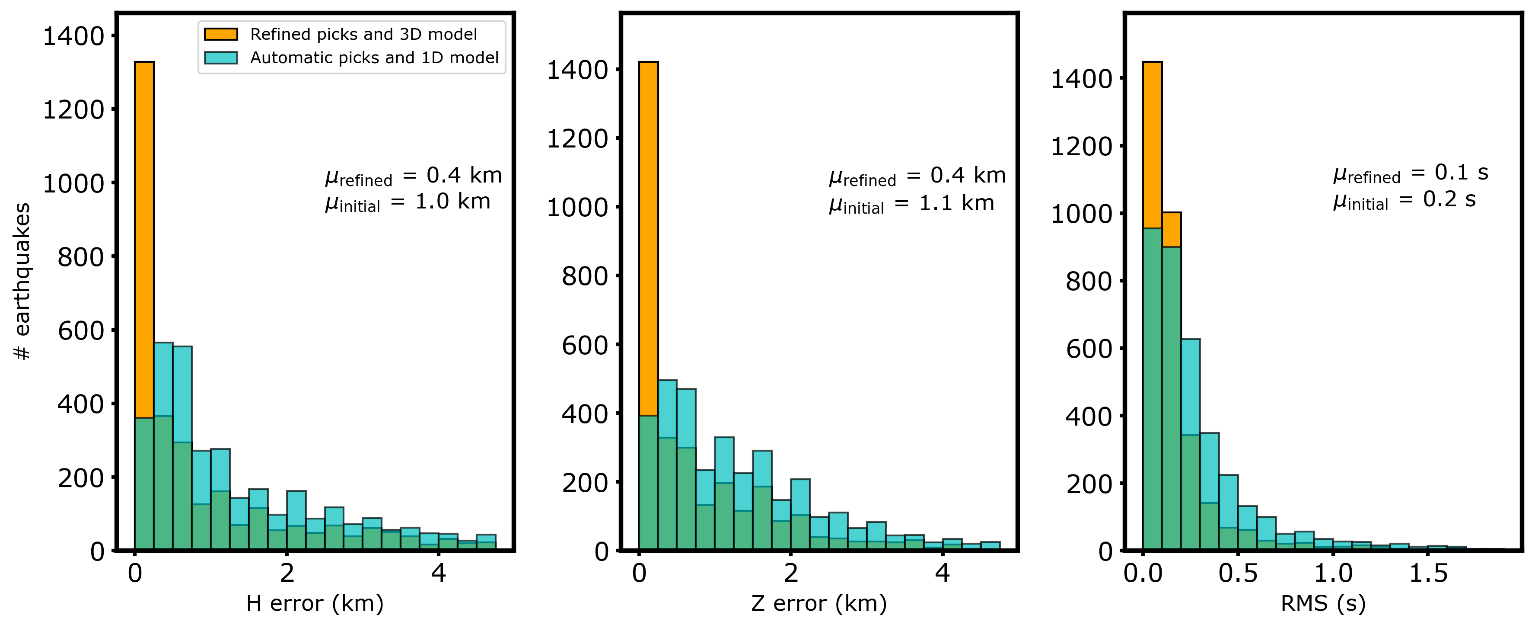
**

***Figure S2:*** *Histograms of location uncertainties (horizontal errors: left panel, vertical uncertainties: center panel, RMS of the arrival time residuals: right panel) for the absolute location from automatic phase arrival times and a 1D layer velocity model (cyan bars) and from refined arrival times and 3D velocity model (yellow bars). The implementation of refined arrival times and the adoption of a 3D velocity model can halve location uncertainties, achieving median spatial errors of 400m and RMS of 0.1s.*

**Figure S3**

**
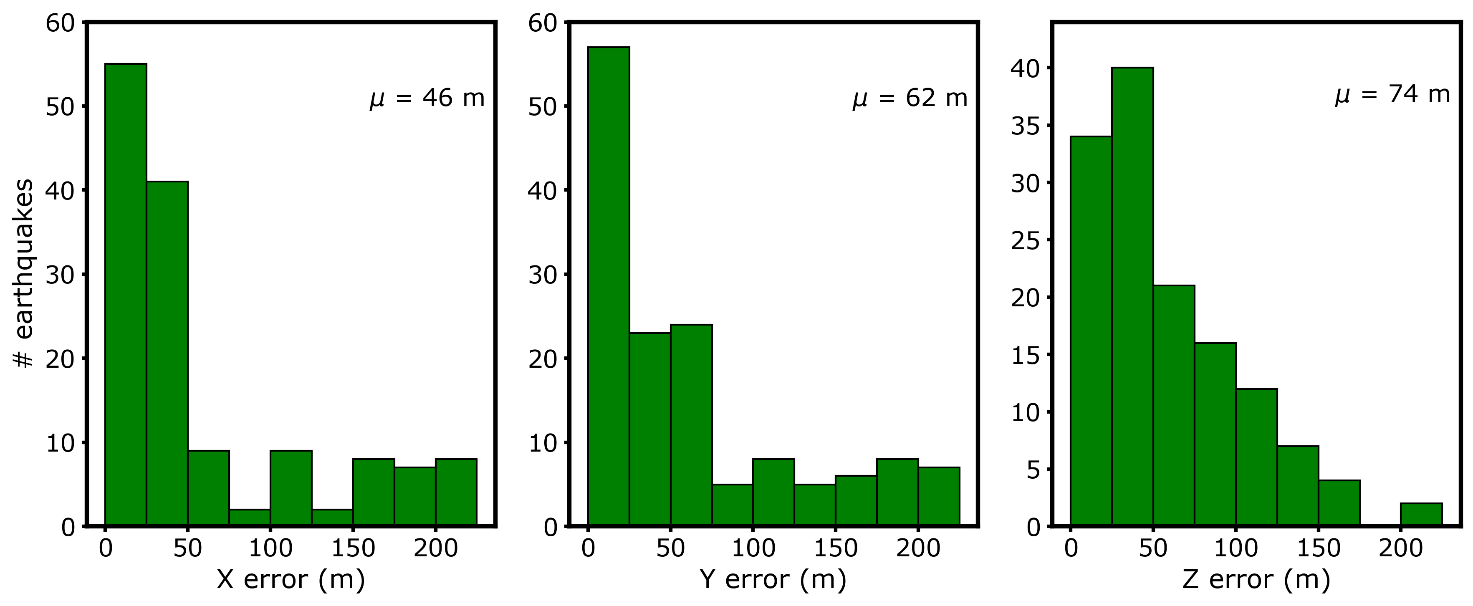
**

***Figure S3:*** *Histograms of spatial location uncertainties extracted from iterative SVD inversions. For this analysis, groups of 100 events within a distance of 1km in the refined 3D absolute location are selected. The resulting median uncertainties in the x,y and z directions (46m, 62m and 74 m, respectively), significantly reduce the spatial location uncertainties observed for the absolute location in the 3D model.*
